# Supplementary material for: Comparison Of Airflow Patterns Between Patient With Septal Deviation And Normal Nasal Cavity Using Computational Fluid Dynamics
Source: Preprints.org preprint supplement (doi:10.20944/preprints202308.0505.v1), 2023-08-07
Supplement: Supplementary file 2 [file supplementary]

**NOSE scale:**

**
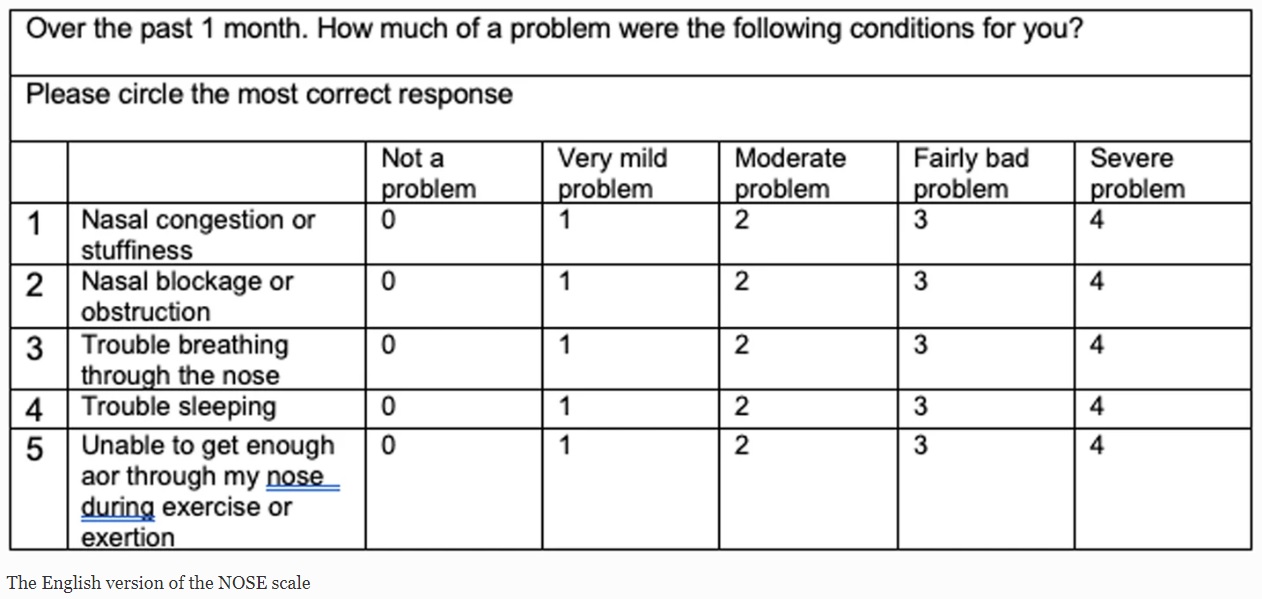
**

**Velocity contours of NSD and normal nasal cavity:**


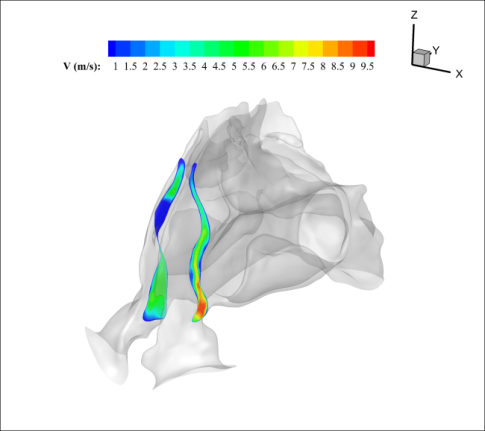


*Velocity contours of nasal cavity with NSD (24 mm from nasal tip)*


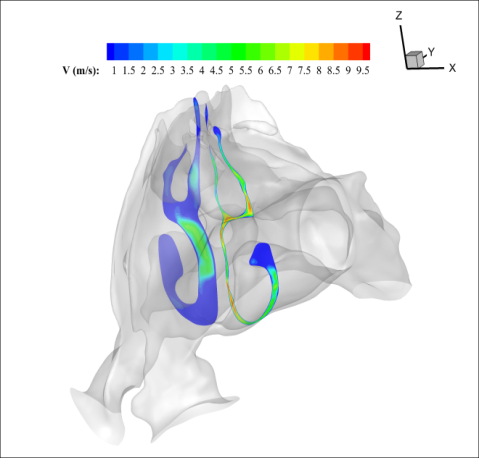


*Velocity contours of nasal cavity with* *NSD (40 mm from nasal tip)*


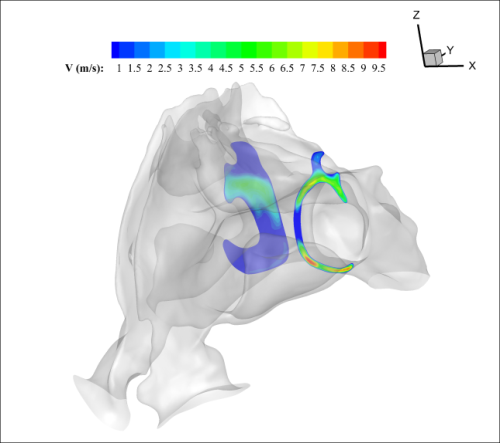


*Velocity contours of nasal cavity with NSD (72 mm from nasal tip)*


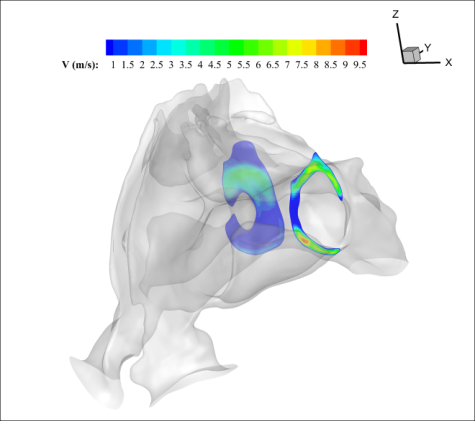


*Velocity contours of nasal cavity with NSD* (88 mm from nasal tip)


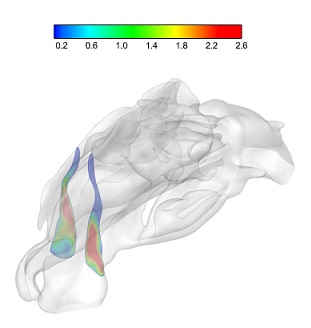


*Velocity contours of normal nasal cavity (24 mm from nasal tip)*


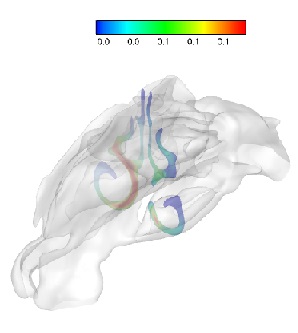


*Velocity contours of normal nasal cavity (40 mm from nasal tip)*


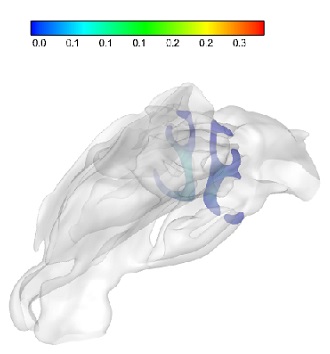


*Velocity contours of normal nasal cavity (72 mm from nasal tip)*

*
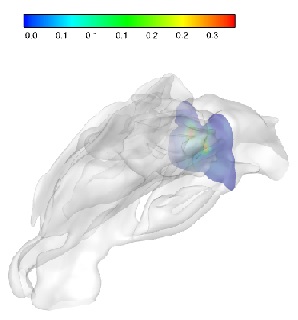
*

*Velocity contours of normal nasal cavity (88 mm from nasal tip)*
